# Supplementary material for: Spatial Principles of Chromatin Architecture Associated With Organ-Specific Gene Regulation
Source: PubMed Central journal article supplement (PMC6341059; doi:10.3389/fcvm.2018.00186), 2019-01-15
Supplement: Table_1.pdf [file Table_1.pdf]

|                               | Liver      | Heart      |
|-------------------------------|------------|------------|
| Total_pairs_processed         | 1514557906 | 1362691412 |
| Unmapped_pairs                | 21566557   | 11599265   |
| Low_qual_pairs                | 0          | 0          |
| Unique_paired_alignments      | 926874402  | 849101181  |
| Multiple_pairs_alignments     | 408751544  | 385904274  |
| Pairs_with_singleton          | 157365403  | 116086692  |
| Low_qual_singleton            | 0          | 0          |
| Unique_singleton_alignments   | 0          | 0          |
| Multiple_singleton_alignments | 0          | 0          |
| Reported_pairs                | 926874402  | 849101181  |

|                            | Liver     | Heart     |
|----------------------------|-----------|-----------|
| Valid_interaction_pairs    | 701407381 | 807707536 |
| Valid_interaction_pairs_FF | 167026398 | 200806229 |
| Valid_interaction_pairs_RR | 167121126 | 200745187 |
| Valid_interaction_pairs_RF | 167062459 | 199501877 |
| Valid_interaction_pairs_FR | 200197398 | 206654243 |
| Dangling_end_pairs         | 140829780 | 20685150  |
| Religation_pairs           | 80093214  | 17757504  |
| Self_Cycle_pairs           | 2047729   | 967879    |
| Single-end_pairs           | 0         | 0         |
| Dumped_pairs               | 2496298   | 1983112   |

|                         | Liver     | Heart     |
|-------------------------|-----------|-----------|
| Valid_interaction       | 701407381 | 807707536 |
| Valid_interaction_rmdup | 613559460 | 720072695 |
| Trans_interaction       | 272280195 | 323763107 |
| Cis_interaction         | 341279265 | 396309588 |
| Cis_shortRange          | 83657373  | 74217618  |
| Cis_longRange           | 257621892 | 322091970 |

|                                      | Liver | Heart  |
|--------------------------------------|-------|--------|
| Fit-Hi-C interactions (q<0.01) INTRA | 90587 | 115843 |
| Fit-Hi-C interactions (q<0.01) INTER | 94301 | 51370  |
