# Supplementary material for: Spatial Principles of Chromatin Architecture Associated With Organ-Specific Gene Regulation
Source: PubMed Central journal article supplement (PMC6341059; doi:10.3389/fcvm.2018.00186), 2019-01-15
Supplement: Table_2.pdf [file Table_2.pdf]

Genes with Promoter-TESS Interaction in Cardiac Hi-C Data

|          |           |               |               |               |               |
|----------|-----------|---------------|---------------|---------------|---------------|
| Acads    | Mb        | Mydgd         | Evx1os        | Lao1          | Zdhhc22       |
| Adam12   | Mbd3      | Gnl3          | Med26         | Oas1d         | Kcng2         |
| Adcy6    | Mbl1      | Tor1a         | Sik3          | Nsun5         | Pik3c2b       |
| Aif1     | Mbl2      | Tor1b         | Prss41        | Upk3b         | 4933406M09Rik |
| Alox12e  | Meis1     | Slc46a2       | Zfp689        | Chpf2         | D430041D05Rik |
| Aoc3     | Mertk     | Lsm4          | Naif1         | Srx21         | Kcnk15        |
| Ap2m1    | Mip       | Irx4          | 4933433G15Rik | Ric8a         | Klhdc7a       |
| Ap4m1    | Meis2     | Myadm         | 4933440J02Rik | Tubg1         | Gzmn          |
| Aqp3     | Mtx1      | Ccdc97        | Trem1         | Tubg2         | Amdhd2        |
| Arvcf    | Myl3      | Ldirad4       | Rnf215        | Itga9         | Ssh3          |
| Bmp10    | Myl2      | Arhgef25      | Tmem25        | Cdc42ep2      | Cd207         |
| Bsn      | Nab2      | Dbnnd2        | Mus81         | Slc39a3       | Mfrp          |
| C1qb     | Ncf1      | Ybx2          | Pitpnc1       | Brms1         | Mpg           |
| Capns1   | Ndufv1    | Prg3          | 1700003E16Rik | Mrpl10        | Eme1          |
| Cbl      | Nfkb2     | Rab25         | Dpep3         | Bre           | Wdr24         |
| Cct6a    | Nfkbie    | ift20         | Jsrp1         | Shmt2         | Dpcr1         |
| Cd19     | Nefm      | Gtpbp2        | Tmem79        | Tbx10         | Orai3         |
| Cd37     | Npdc1     | Cpxm1         | Ephx3         | Hyal3         | Ccdc153       |
| Entpd1   | Nthl1     | Ppp4c         | Gpc2          | Slc35b1       | Spib          |
| Cd72     | Nxn       | Ctsf          | Cdca4         | Akr7a5        | Fam205c       |
| Ift81    | Ogg1      | Arl10         | Erv3          | Krt5          | Pced1a        |
| Cdx2     | Olfir59   | Apba3         | Cyb5r1        | Pigh          | Gm20735       |
| Cel      | Pck1      | Wdr46         | Entpd8        | Timp4         | Ablim3        |
| Celsr1   | Pcsk4     | Ppp1r1a       | 1810062G17Rik | Mbd6          | 3-Mar         |
| Ckmt1    | Pde6g     | Cts6          | Asb6          | Clic1         | Grin1os       |
| Ccr2     | Prf1      | Rps6kb2       | Klh40         | 4930433N12Rik | Zfp629        |
| Cnih2    | Plau      | Pnkp          | 2210016L21Rik | Cts8-ps       | B230319C09Rik |
| Cnp      | Plcb2     | Slc22a17      | Ccdc71        | Cts3          | B230206H07Rik |
| Col14a1  | Serpinf2  | Jph2          | Aldh1b1       | Gjc2          | Mical2        |
| Cpne6    | Npy4r     | Myg1          | C1qtnf6       | Grin3b        | Trmt61a       |
| Cryab    | Mapk11    | Fam129a       | B3gat3        | Znr1          | Lgr6          |
| Cryba4   | Klk6      | Rbp7          | Tymp          | Socs7         | C130026L21Rik |
| Cyp17a1  | Cyth2     | Slc29a1       | 2900057B20Rik | Rassf3        | Zc3h4         |
| Cyp1a1   | Psmc3     | Ctsm          | Prss57        | BC018473      | Rnf150        |
| Dapk2    | Ptp4a3    | Dpys15        | Tm7sf2        | Zbtb7c        | Krt78         |
| Des      | Igdcc3    | Slc9a3r2      | 1700065J11Rik | Alg3          | Morn2         |
| Dlx4     | Pxn       | P3h4          | Izumo1        | Sirt7         | Lrrc24        |
| Ebf1     | Rab20     | Them5         | 1700067G17Rik | Eif2b1        | A230065H16Rik |
| Eef2k    | Rad9a     | Nicn1         | Mfsd12        | Irgq          | Prickle4      |
| Efna1    | Rai1      | Pam16         | Tm9sf1        | Mrgprf        | Stum          |
| Egr3     | Rara      | Pnpla2        | Uba7          | Dcaf15        | Sbk2          |
| Ehd1     | Rfxank    | Tmx2          | Perm1         | Pggghg        | Gm26705       |
| Eif2b4   | Rgl2      | Plin5         | 2310065F04Rik | Crygn         | Ccdc84        |
| Eif4a1   | S100a10   | Tmem134       | 4931428F04Rik | Mmp21         | Cdsn          |
| Eif4ebp1 | Ccl22     | Cep19         | 4931430N09Rik | Rhot2         | Thoc6         |
| Eno3     | Ce19      | Med29         | 4930478P22Rik | Slc43a2       | C730036E19Rik |
| Fgf8     | Nptn      | Gpx7          | Mamstr        | Iba57         | Dgkeos        |
| Fhl4     | Sh2b1     | Qcctl         | Nkx6-3        | Spag7         | D630024D03Rik |
| Fkbp10   | Ptk6      | 4921536K21Rik | 4930488B22Rik | BC030499      | Itprp         |
| Flt3l    | Slc22a12  | Ccdc127       | Efcab10       | Gm11545       | Lymr7os       |
| Fosb     | Sifn1     | Map1lc3b      | 4930515B02Rik | Stxbp6        | Trim80        |
| Fut4-ps1 | Sstr3     | Abhd15        | Dusp18        | Gphb5         | Ly6g6f        |
| Slc37a4  | Serpina3m | 1700019N19Rik | Sirt4         | Susd6         | Jmjd7         |
| Gata5    | Srms      | Nmra1         | 4930591E09Rik | Acot6         | Gm13119       |
| Gba      | Aurkb     | Cdca5         | Slc6a21       | Mfsd7c        | Klhdc7b       |
| Gcgr     | Bhlhe40   | Mri1          | Tmem234       | Rrp36         | Cfap73        |
| Gjc1     | Stx4a     | 1110004E09Rik | Scarletttr    | Apbb3         | Gm15713       |
| Gnat1    | Tagln2    | Lurap1        | St5           | Catsper1      | D330041H03Rik |
| Rack1    | Tcea2     | Sdccag3       | 2510039O18Rik | Npas4         | Gm7538        |
| Grk5     | Prdx2     | Pomgnt1       | Klh2          | Cfap157       | Gm10433       |
| Grb2     | Tgfb3     | Crip2         | 9930111H07Rik | Large2        | Gm16287       |
| Hlx      | Thy1      | 0610030E20Rik | Spata31       | Trib3         | D4Ert617e     |
| Nr4a1    | Tlx1      | Fam189b       | Creb3l4       | Hcrtr1        | Gm13648       |
| Hspa1l   | Traf5     | Wipf2         | 2210407C18Rik | Man1c1        | Rpl37rt       |
| Hsd11b2  | Tuba1c    | Syf2          | Fam131a       | Fbxo44        | Gm10814       |
| Hsp90ab1 | Uck1      | Fbxw9         | B430010I23Rik | Plekhn1       | Gm19510       |
| Ii11     | Upk3a     | Slc44a2       | Cxcr6         | Sds           | Gm15408       |
| Ilf3     | Cdh23     | Trp53inp2     | Kat5          | Fam109a       | Gm13003       |
| Ilk      | Vav2      | Acss1         | Ankrd17       | Mat2a         | Cbarp         |
| Irf1     | Vegfb     | Taf11         | Wdr6          | Arhgap35      | Gm29805       |
| Itgb5    | Fmn13     | Gsdmd         | Il24          | Klc3          | Gm12348       |
| Kcna7    | Xbp1      | 1700003D09Rik | Pcdhgc3       | Tbc1d17       | LOC105246506  |
| Kcnab3   | Ywhag     | Tfpt          | Arid1a        | Prr14         |               |
| Kcnj12   | Rnf112    | 2410004I01Rik | Cnmn2         | Ccdc189       |               |
| Kcnk4    | Zfp46     | Nabp2         | Tinag1        | Csgalnact1    |               |
| Krt33b   | Zp3       | Spaca9        | Ptges2        | Ces2b         |               |
| Krt1     | Car14     | Srrd          | D930048N14Rik | Elmo3         |               |
| Krt84    | Pappa2    | Hk1os         | Nol12         | Carmil2       |               |
| Krt4     | Impdh2    | 2010107E04Rik | Deptor        | Cdk10         |               |
| Krt8     | Mapk7     | Plscr3        | Phlpp1        | 6030466F02Rik |               |
| Lat      | Dazap2    | Cactin        | Ehd4          | Atg4d         |               |
| Lhx3     | B9d1      | Reep6         | Abtb2         | Stac3         |               |
| Mycl     | Naglu     | Kptn          | Tchh          | Pla2g3        |               |
| Mafg     | Nagpa     | Dhrs13        | Fam46b        | Fscn2         |               |
