# Supplementary material for: Spatial Principles of Chromatin Architecture Associated With Organ-Specific Gene Regulation
Source: PubMed Central journal article supplement (PMC6341059; doi:10.3389/fcvm.2018.00186), 2019-01-15
Supplement: Table_3.pdf [file Table_3.pdf]

Genes with Promoter-TES Interaction in Liver Hi-C Data

|           |               |               |               |
|-----------|---------------|---------------|---------------|
| Acr       | Stat3         | Efcab10       | Gzmn          |
| Aif1      | Wnt8a         | 4930515B02Rik | Cd207         |
| Alox12e   | Sdc4          | Spaca6        | Slc5a2        |
| Aqp2      | Tfeb          | Prr3          | Olfrl183      |
| Aqp3      | Tubb4a        | 4930555B11Rik | Olfrl1414     |
| Bsn       | Ywhag         | Ankrd53       | Trim61        |
| C1qb      | Rnf112        | Slitrk5       | Krt12         |
| C3        | Zfp93         | 4930591E09Rik | E030025P04Rik |
| C4b       | Pappa2        | Rnf183        | Mir124a-1hg   |
| Cd24a     | Fiz1          | Fbxo31        | Dpcr1         |
| Cd37      | Prnd          | Got111        | Zfp384        |
| Cd82      | Ing4          | Slc6a21       | Tm4sf19       |
| Celsr1    | Gnl3          | St5           | Klk15         |
| Ccr1      | Irx4          | Fam162b       | Klk14         |
| Ccr5      | Ech1          | 9930111H07Rik | A830011K09Rik |
| Col10a1   | Lurap1l       | B230112J18Rik | Ablim3        |
| Cpne6     | Prg3          | Ccdc190       | 4732490B19Rik |
| Crx       | Rab25         | Tmem247       | Tmem91        |
| Csk       | Chst2         | Nol3          | Il1bos        |
| Cst7      | Prss16        | B430010I23Rik | Zfp78         |
| Cyp1a1    | Irgm2         | Fbxo34        | Serpina11     |
| Cyp1a2    | Il1f5         | Dtx3          | Gm1587        |
| Des       | Cts7          | Siglece       | Sbk3          |
| Dhh       | Cpxm1         | Trem2         | Sbk2          |
| Dnase1l3  | Dmrtb1        | Pcdhgb8       | Gm26705       |
| Ecm1      | Ick           | Pcdhga12      | Serpina3d     |
| Edn2      | Kcne3         | Pcdhb16       | Krt87         |
| Eno2      | Asic5         | Tchh          | Lym7os        |
| Ephx2     | Ppp1r1a       | Lao1          | Ankrd13c      |
| Fasl      | Cts6          | Oas1d         | Gm1965        |
| Fga       | Rnf130        | Upk3b         | Tmem92        |
| Flt3l     | Gmfg          | Al314278      | Arsi          |
| Fut4-ps1  | Ctsm          | Fam110c       | Gpr17         |
| Gjc1      | Dpysl5        | Gmpr2         | 9230009I02Rik |
| Gnl1      | Gkn2          | Mmnrn2        | Zfp551        |
| Gna12     | Ubxn6         | Krt9          | Gm11437       |
| Gna15     | Cep19         | Rnf169        | Angptl7       |
| Got1      | Ceacam11      | R3hdm4        | Gm16287       |
| Lpcat3    | Nde1          | Pgc           | D4Ert617e     |
| H2-Q4     | Kcnv1         | Krt5          | Gm4719        |
| H2-T10    | Rnf41         | Pigh          | Krt83         |
| Hpx       | Polr2g        | Timp4         | Gm12505       |
| Igfbp6    | Sec14l2       | Cd209d        | Gm19345       |
| Il12a     | Nmral1        | Cd209a        | A730020E08Rik |
| Il2       | Snrpg         | Gpr371l       | Gm29805       |
| Irx1      | A930003A15Rik | Rassf3        | Gm29669       |
| Irx2      | Rab13         | BC018473      |               |
| Itih1     | Tmem216       | Pom121l2      |               |
| Kcna4     | Nadk2         | Dtx4          |               |
| Serpina3c | Lyzl6         | Ghsr          |               |
| Krt19     | 2310034005Rik | Zfp710        |               |
| Krt33b    | Tatdn1        | Best2         |               |
| Krt86     | Prss32        | Pth2r         |               |
| Krt84     | Nabp2         | Slc43a2       |               |
| Krt2      | Spaca9        | Slc36a1       |               |
| Mfap2     | 2610528A11Rik | Gm38403       |               |
| Fxyd3     | Hk1os         | Mgl2          |               |
| Cxcl9     | 2010107E04Rik | Trim25        |               |
| Myl3      | Gfod2         | Gm11545       |               |
| Myl2      | Krt28         | Mfsd7c        |               |
| Neurl1a   | 4933432G23Rik | Zfp503        |               |
| Nefm      | Dmrtc2        | Shisa2        |               |
| Nhh2      | 4933430N04Rik | Rtp2          |               |
| Nov       | 4933433G15Rik | Speer2        |               |
| Nr4a2     | Susd2         | Al661453      |               |
| Nxn       | Dpep3         | Dpp9          |               |
| Pax4      | Dnmbp         | 1110051M20Rik |               |
| Pck1      | Erv3          | Gimap7        |               |
| Penk      | Gcnt3         | Lypd4         |               |
| Pomc      | Spata31d1a    | Acsm2         |               |
| Klk6      | 1700021F07Rik | Thumpd1       |               |
| Ptcra     | 1700030O20Rik | Ces2b         |               |
| Qk        | Ces2g         | Tat           |               |
| Rcvrn     | Tagap         | 6030466F02Rik |               |
| Resp18    | Smc2os        | Apeh          |               |
| Stmn3     | Rassf6        | Prss42        |               |
| Cel6      | Bpifa3        | Pla2g3        |               |
| Sfrp2     | 1700067G17Rik | Spata31d1b    |               |
| Nptn      | 4930428G15Rik | Lrit1         |               |
| Slc31a1   | Zswim5        | Neu4          |               |
| Slfm1     | Ifitm7        | Kcng1         |               |
| Serpina3g | Mamstr        | Cela3a        |               |
| Serpina3n | 4930448H16Rik | Nyap1         |               |
| Spic      | 4930503B20Rik | Pskh1         |               |
